# Supplementary material for: Synthesis and properties of ionic liquids derived from the ‘chiral pool’Electronic supplementary information (ESI) available: characterisation of compounds 1a, 2 and 3. See http://www.rsc.org/suppdata/cc/b1/b109493a/
Source: Royal Society of Chemistry journal article supplement (doi:10.1039/b109493a), 2002-01-07
Supplement: b109493a.doc [file b109493a.doc]

**Supplementary data**

Characterisation of compounds:

**1a** : Anal. Calcd. for C13H26 F6NOP, %: C, 43.70; H, 7.33; F, 31.90; N, 3.92; O, 4.48; P, 8.67

Found, %: C, 43.74; H, 7.36; F, 31.81 ;N, 3.89; O, 4.58; P, 8.62 .

**2** : Anal. Calcd. for C14H20F6N2O5S2, %: C, 35.44; H, 4.25; F, 24.03; N, 5.90; O, 16.86; S, 13.52

Found, %: C, 35.48; H, 4.27; F, 24.00; N, 5.87; O, 16.89; S, 13.49

MS FAB+: 194 (M+,100), 135 (3.3), 117 (1.2), 72 (3.6), 60 (22.4).

MS FAB-: 280 (M-, 100), 211 (0.49), 147 (2.8), 78 (0.6).

**3** : Anal. Calcd. for C9H18F6N2O5S2 %: C, 26.21; H, 4.40; F, 27.64; N, 6.79; O, 19.40; S, 15.55

Found, %: C, 26.17; H, 4.44; F, 27.59; N, 6.75; O, 19.46; S, 15.59

MS FAB+: 132 (M+,100), 116 (0.51), 100 (0.49), 86 (2.86), 60 (11.45).

MS FAB-: 280 (M-, 100), 211 (0.49), 147 (2.8), 78 (0.6).
